# Supplementary material for: Chiral 1,2-dithiine as a sulfur rich electron acceptor
Source: Royal Society of Chemistry journal article supplement (doi:10.1039/c6nj02292h), 2016-01-01

## Supporting Information

### Chiral 1,2-dithiine as sulfur rich electron acceptor.

Yann Le Gal, Dorine Ameline, Antoine Vacher, Thierry Roisnel, Vincent Dorcet,  
Dominique Lorcy\*

*Institut des Sciences Chimiques de Rennes - UMR 6226 CNRS-Université de Rennes 1, Campus de Beaulieu, Bât  
10A, 35042 Rennes Cedex, France.*

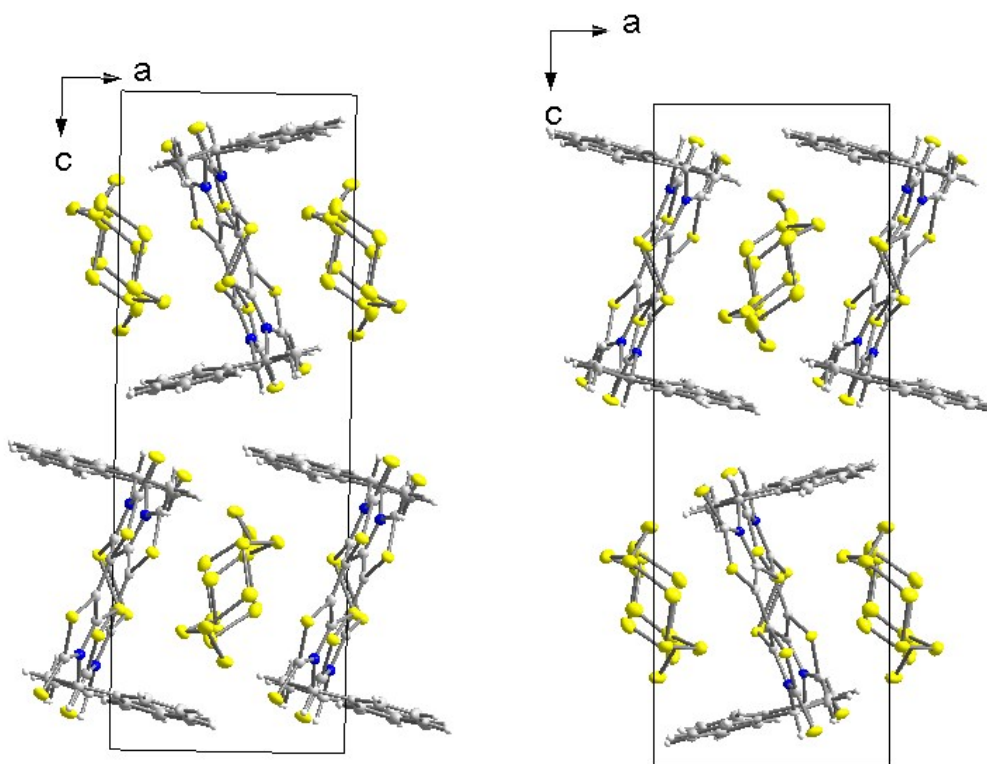

**Figure S1.** Projection view along *b* of the unit cell of **3**.S<sub>8</sub> (*R,R,M*)-**3** (right) and (*S,S,P*)-**3** (left)

## - Spectro electrochemical investigation of **3**

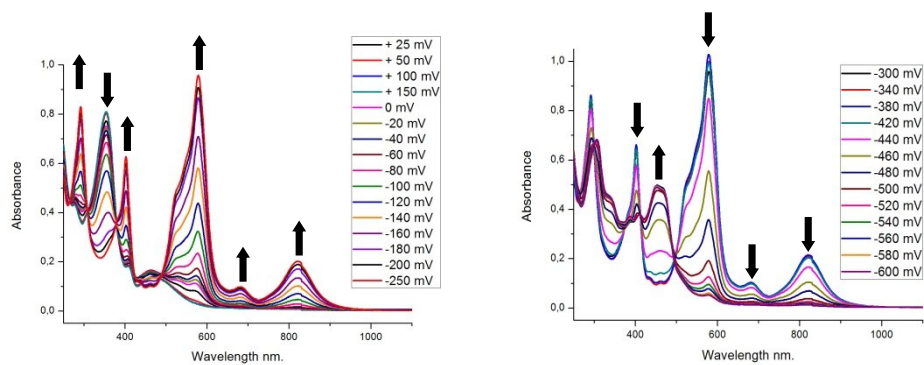

**Figure S2.** UV-vis-NIR monitoring from 0.15 to -0.25 V (left) and from -0.30 to -0.60 V (right) electrochemical reduction of (*S,S,P*)-**3** in 0.2M CH<sub>2</sub>Cl<sub>2</sub> nBu<sub>4</sub>NPF<sub>6</sub>.

-  $^1\text{H}$  and  $^{13}\text{C}$  NMR spectra for compounds 2 and 3

Figure S3.  $^1\text{H}$  NMR spectrum of (*R*)-2

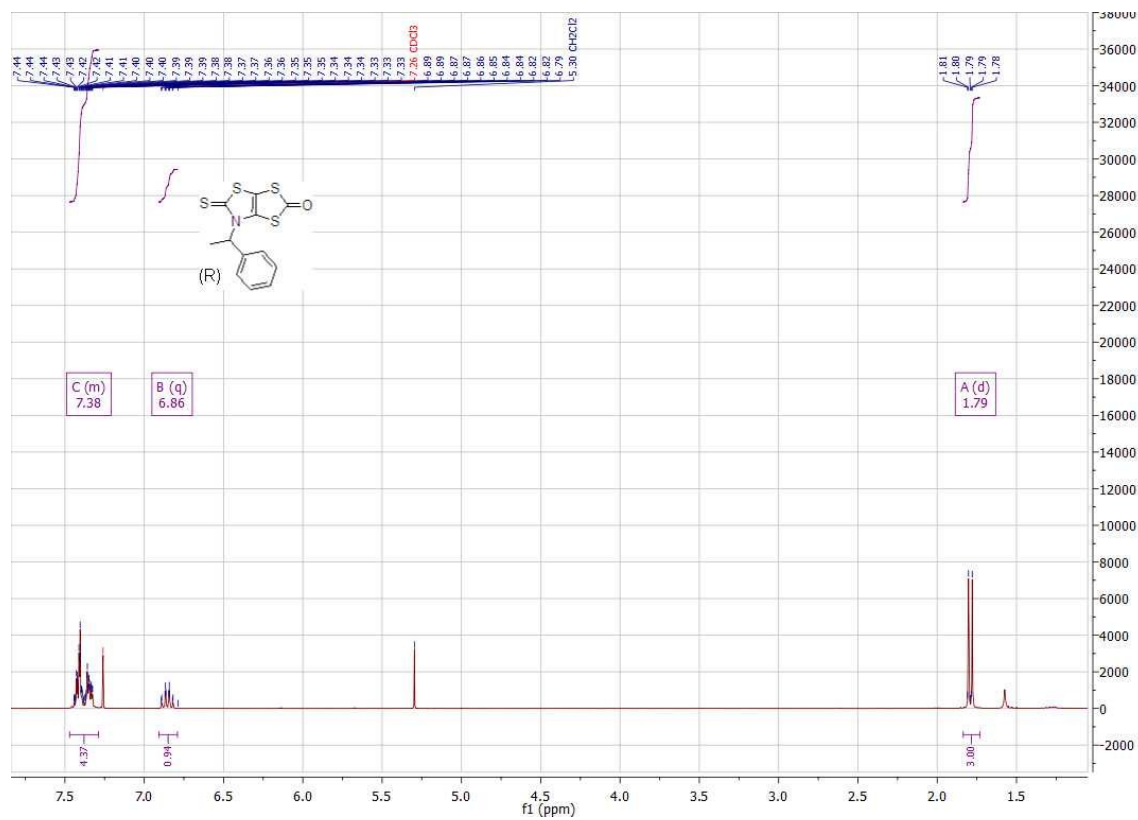

Figure S4.  $^1\text{H}$  NMR spectrum of (*S*)-2

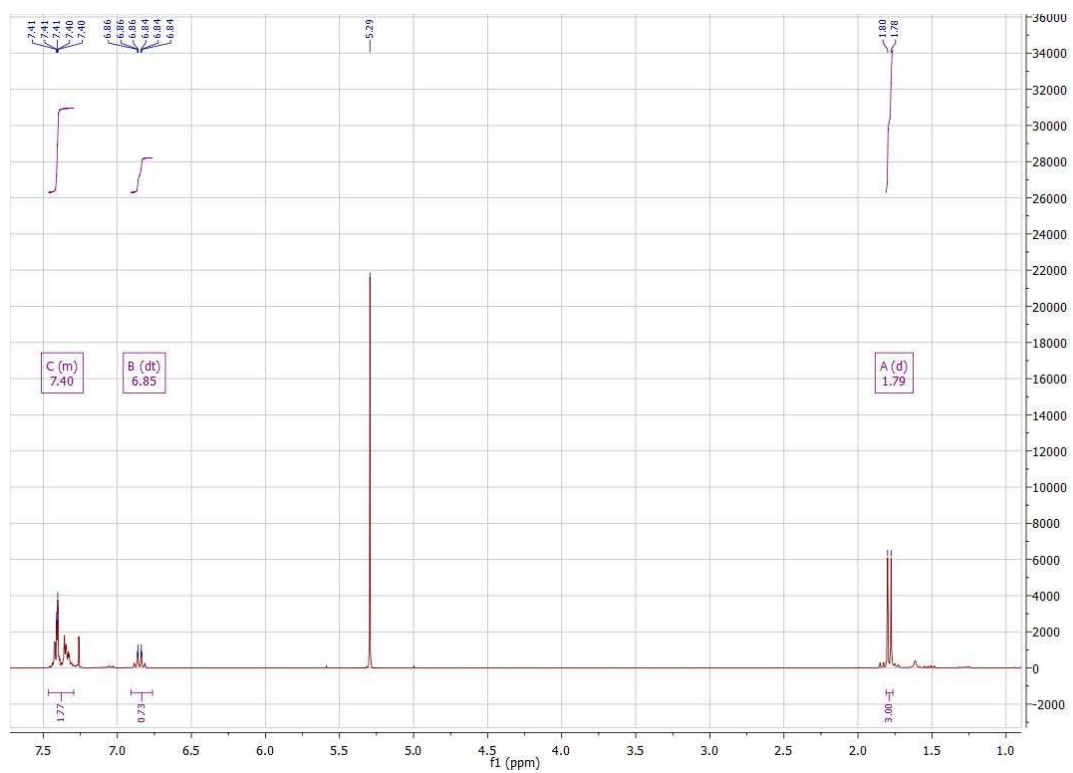

Figure S5.  $^{13}\text{C}$  NMR spectrum of (*R*)-2

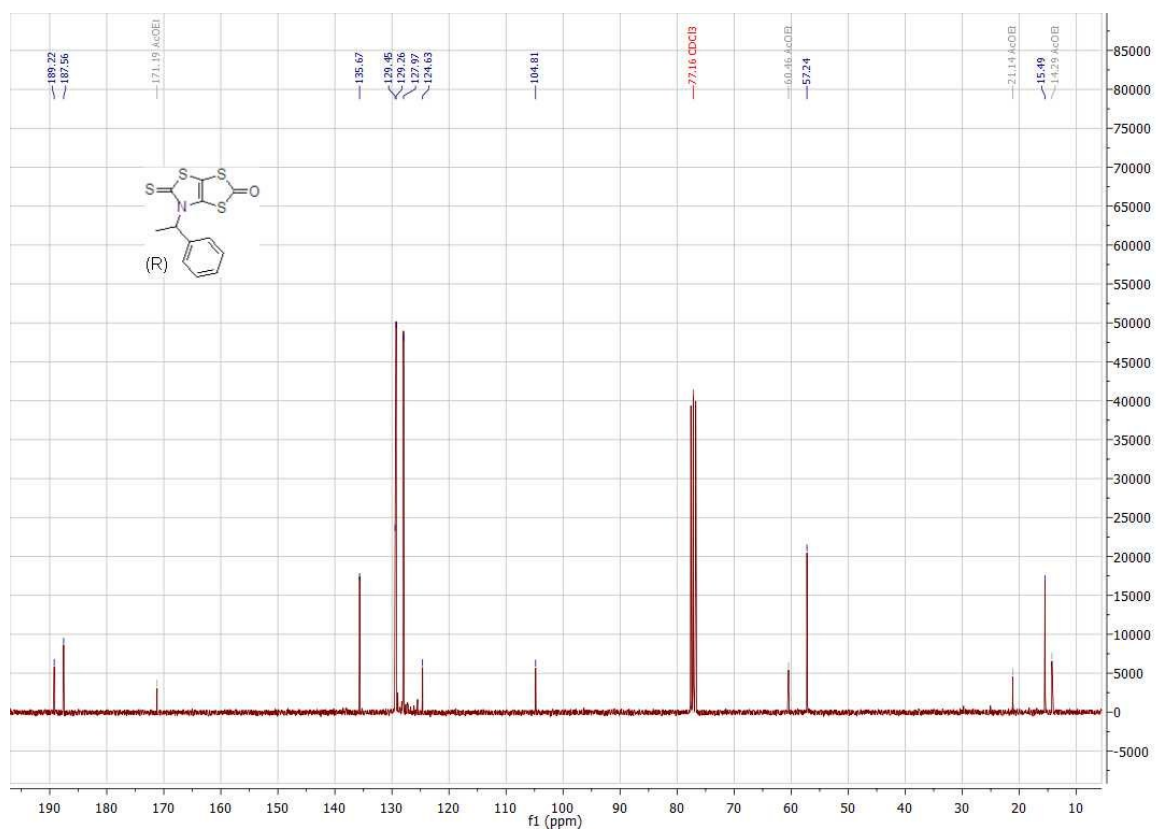

Figure S6  $^{13}\text{C}$  NMR spectrum of (*S*)-2

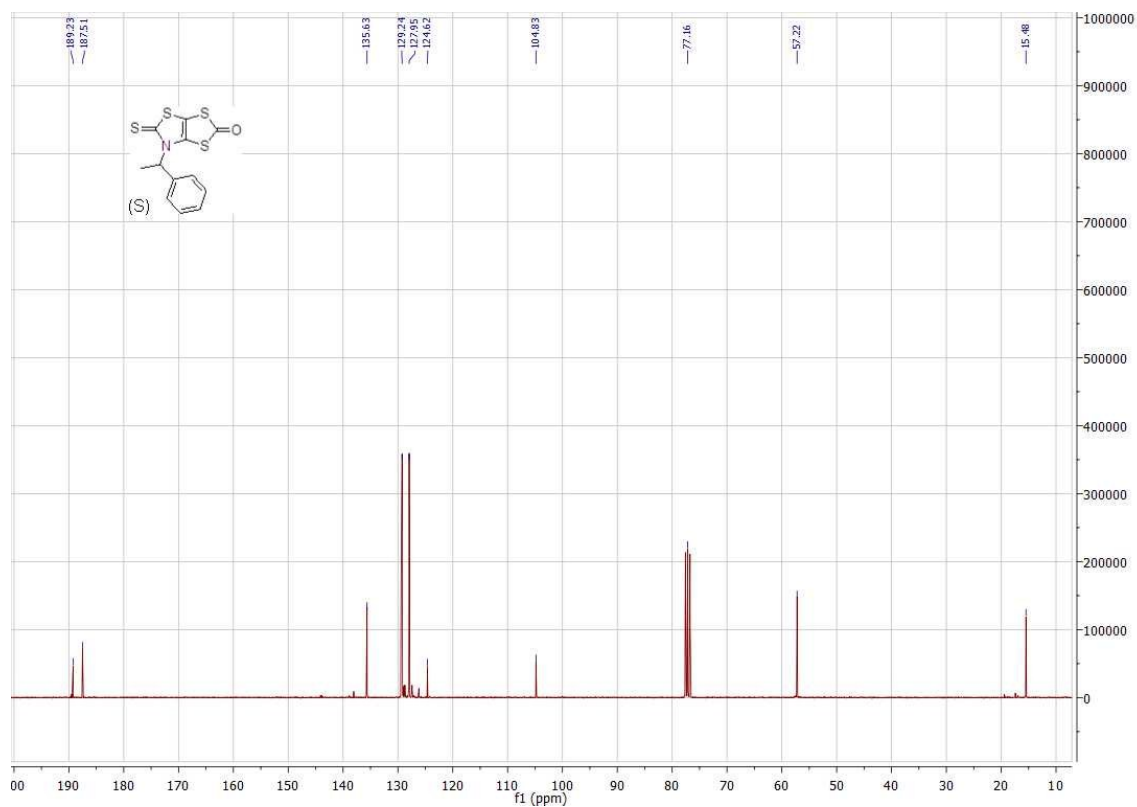

Figure S7  $^1\text{H}$  NMR spectrum of (*R,R*)-3

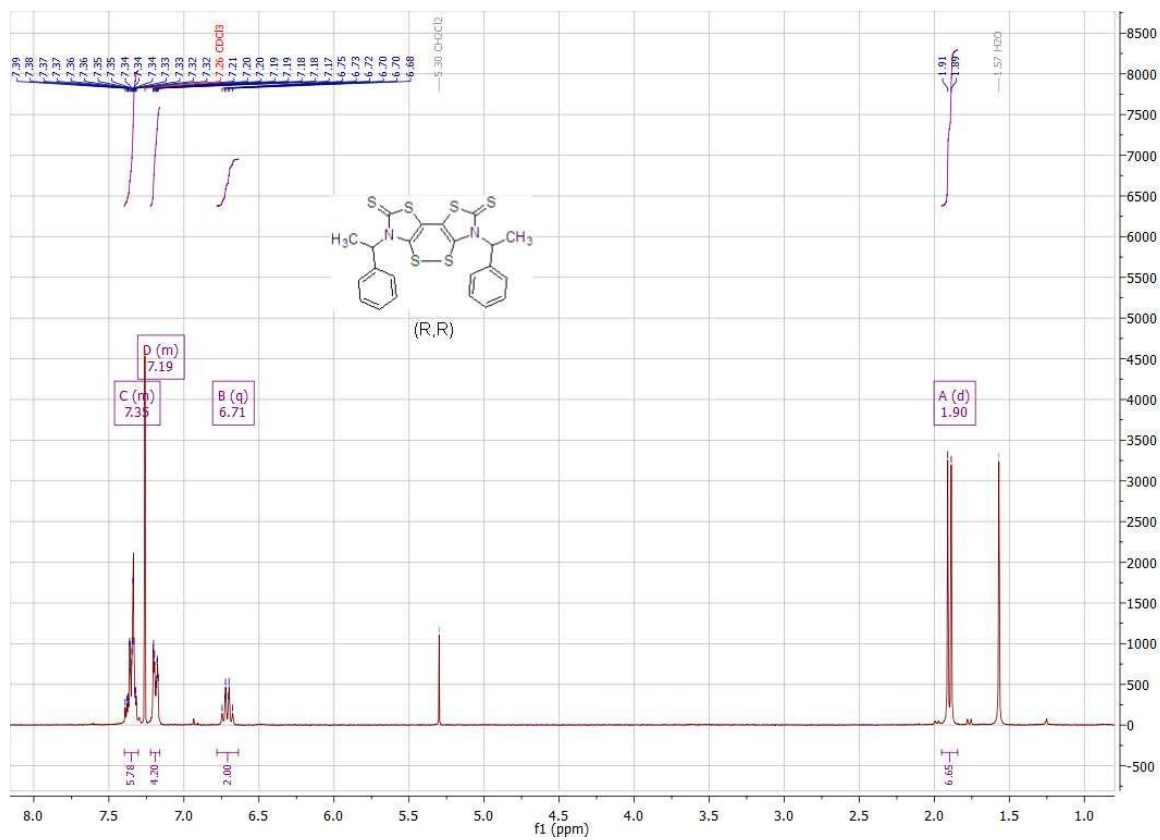

Figure S8  $^1\text{H}$  NMR spectrum of (*S,S*)-3

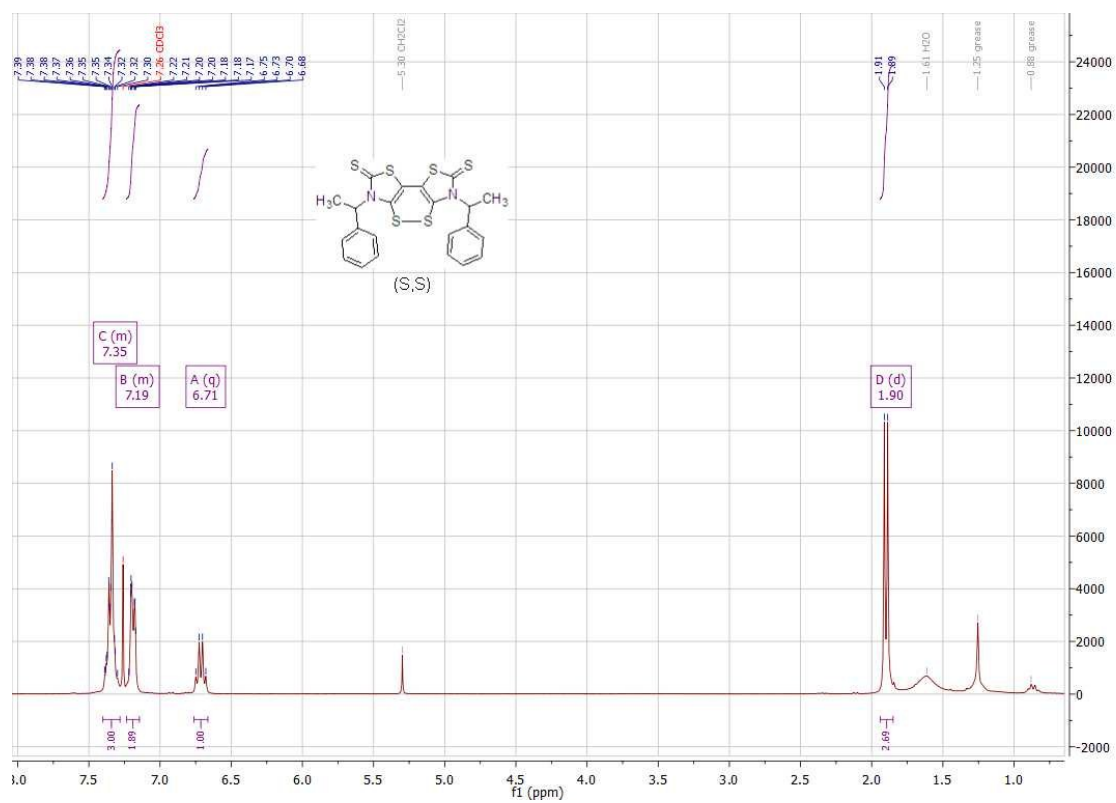

Figure S9  $^{13}\text{C}$  NMR spectrum of (*R,R*)-3

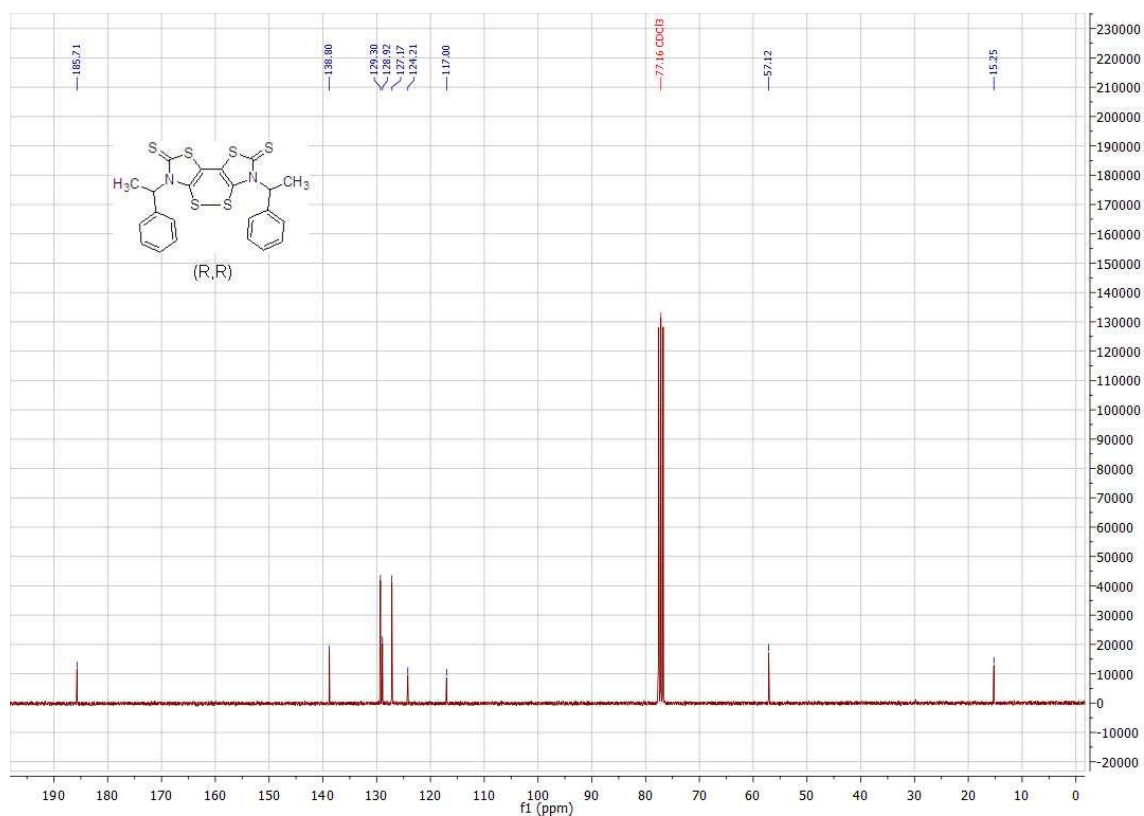

Figure S10  $^{13}\text{C}$  NMR spectrum of (*S,S*)-3

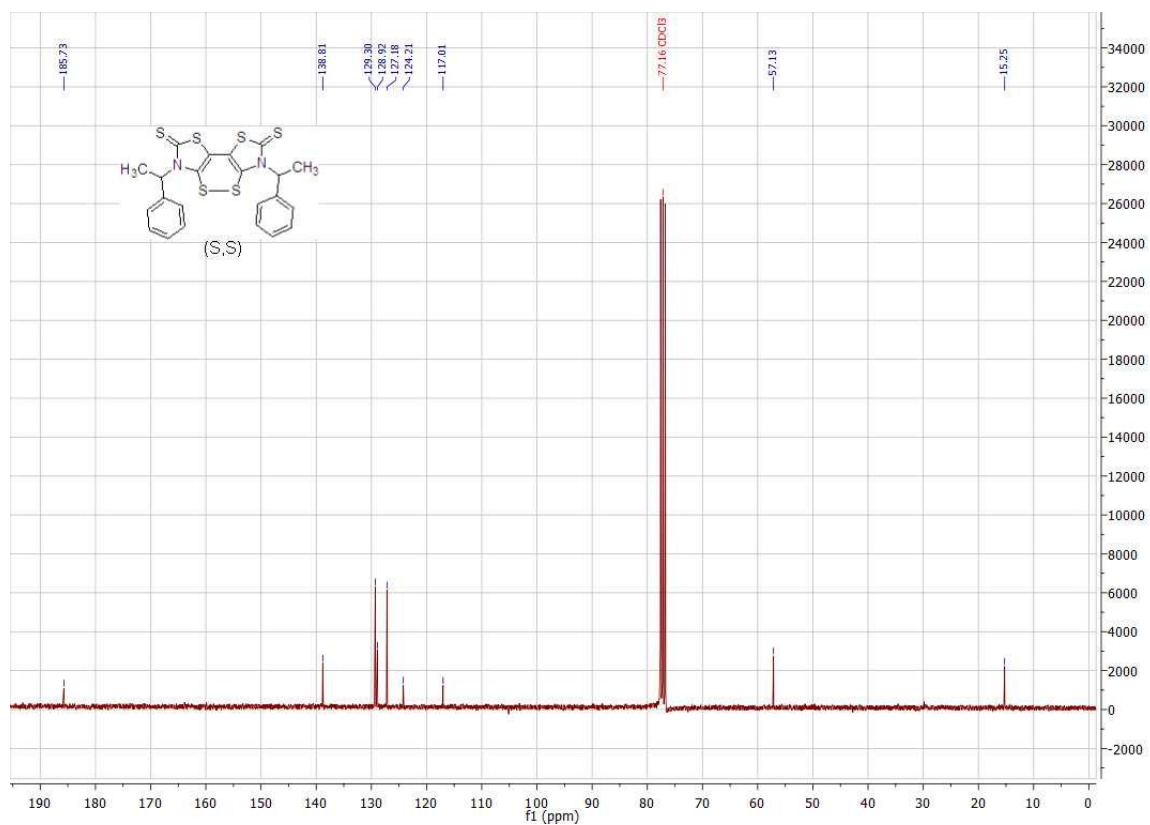

Supplement: c6nj02292h1.pdf [file c6nj02292h1.pdf]
